# Supplementary material for: In situ fabrication of Fe 3 C nanoparticles and porous-carbon composites as high-performance electromagnetic wave absorber
Source: Royal Society of Chemistry journal article supplement (doi:10.1039/d4ra01093k), 2024-01-01
Supplement: d4ra01093k1.pdf [file d4ra01093k1.pdf]

The imidization of PAA was presented in the FTIR spectra in Fig.S1, the PAA materials were confirmed by the characteristic peaks at 1720, 1660, and 1560  $\text{cm}^{-1}$  for the C=O (acid), C=O (amide), and C-N (amide) stretching vibration, respectively. PAA was then transformed to PI via thermal imidization, as shown by the characteristic absorption double peaks at 1781 and 1720  $\text{cm}^{-1}$  for both the symmetric and asymmetric C=O stretching vibrations of the imide group and the peak shift at the 1376  $\text{cm}^{-1}$  and 725  $\text{cm}^{-1}$  C-N-C stretching vibration for PI

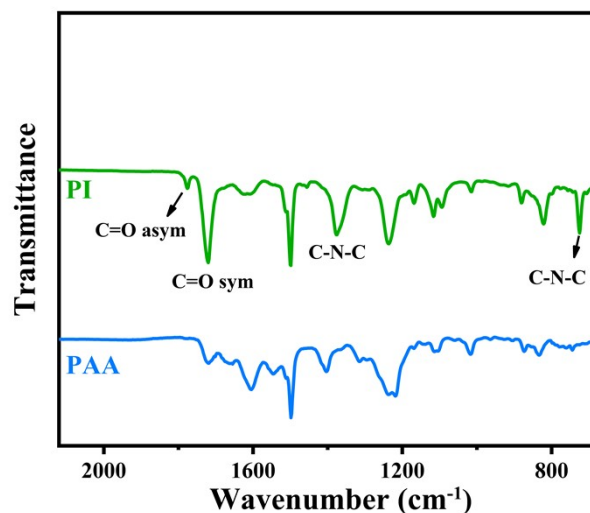

Fig.S1. FTIR spectra of thermal imidization of PAA

The 5% weight-loss temperature of PI was observed as 552  $^{\circ}\text{C}$  And the content of residual carbon of PI is 59.2 %

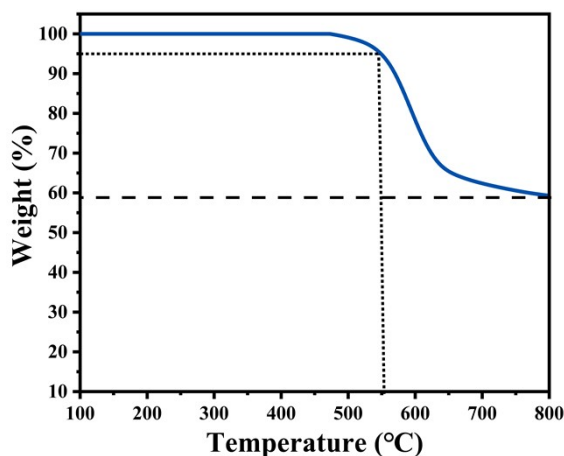

Fig.S2. TGA curves of PI

As PIC only has dielectric loss component, it fails to get a fine EM matching condition and obtain a strong EMW attenuation ability. At a filler loading of 25 wt%, the minimum RL of PIC is -3.68 dB

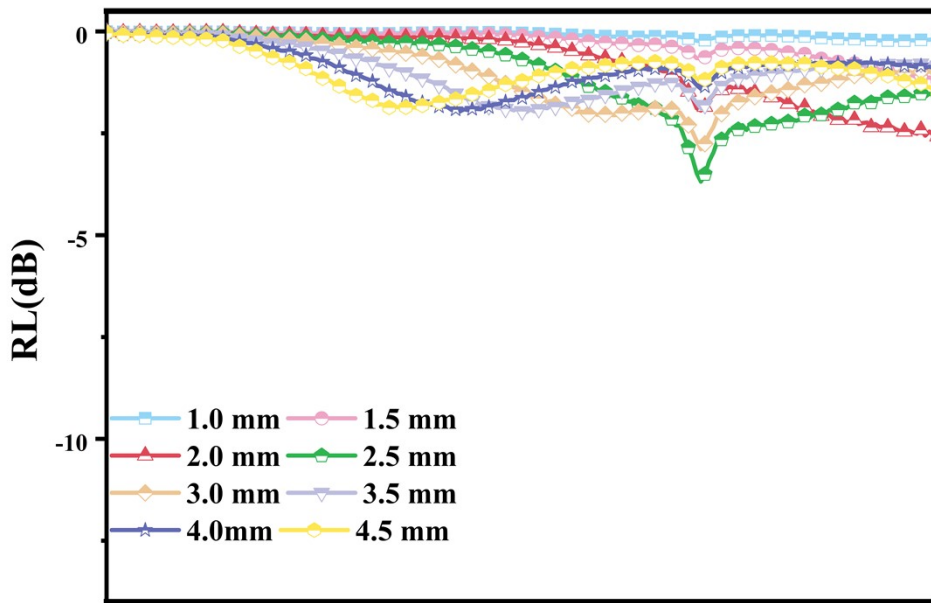

**Fig.S3.** Reflection loss (RL)-frequency curves of PIC in the range of 2–18 GHz with absorber thicknesses from 1.0 to 4.5 mm and an absorber content of 25%.

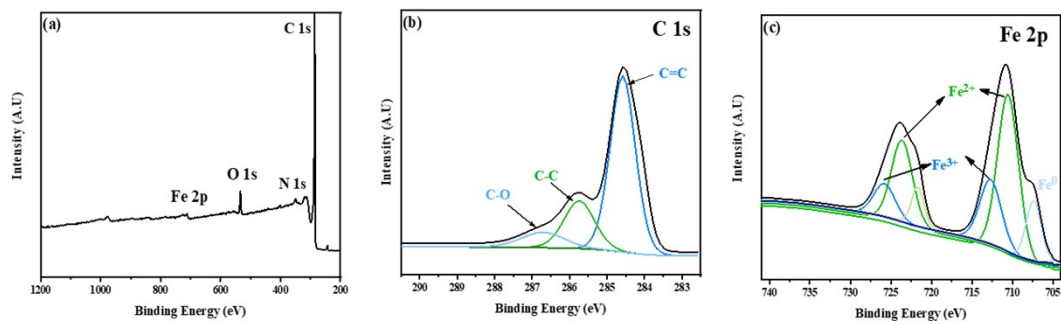

**Fig.S4.** (a) XPS survey spectrum of PIC/Fe<sub>3</sub>C-2; (b) C 1s spectrum; (c) Fe 2p spectrum

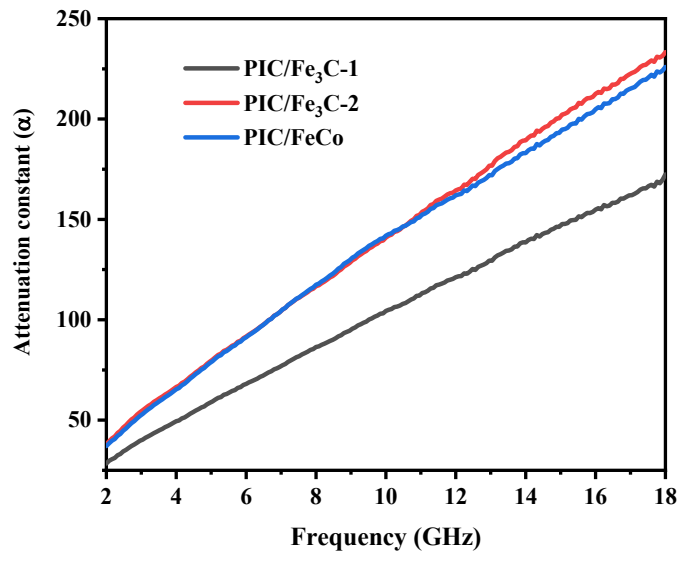

**Fig.S5.** attenuation constant of PIC/Fe<sub>3</sub>C-1, PIC/Fe<sub>3</sub>C-2 and PIC/FeCo
